# Supplementary material for: Nonflammable quasi-solid-state electrolyte for stable lithium-metal batteries
Source: Royal Society of Chemistry journal article supplement (doi:10.1039/c9ra08677c), 2019-01-01
Supplement: c9ra08677c1.pdf [file c9ra08677c1.pdf]

## Supporting Information

# Nonflammable quasi-solid-state electrolyte for stable lithium-metal batteries

Qiusi Sun,<sup>a</sup> Xiao Chen,<sup>a</sup> Jian Xie,<sup>\*a,b</sup> Xiongwen Xu,<sup>c</sup> Jian Tu<sup>c</sup>, Peng Zhang<sup>d</sup> and Xinbing Zhao<sup>\*a,b</sup>

---

<sup>a</sup>State Key Laboratory of Silicon Materials, School of Materials Science and Engineering, Zhejiang University, Hangzhou 310027, P. R. China. E-mail: xiejian1977@zju.edu.cn; Zhaoxb@zju.edu.cn; Fax: +86-571-87951451; Tel: +86-571-87952181

<sup>b</sup>Key Laboratory of Advanced Materials and Applications for Batteries of Zhejiang Province, Hangzhou 310027, P. R. China

<sup>c</sup>LI-FUN Technology Corporation Limited, Zhuzhou 412000, P. R. China

<sup>d</sup>Hangzhou Skyrich Power Co., LTD, Hangzhou 310022, P. R. China

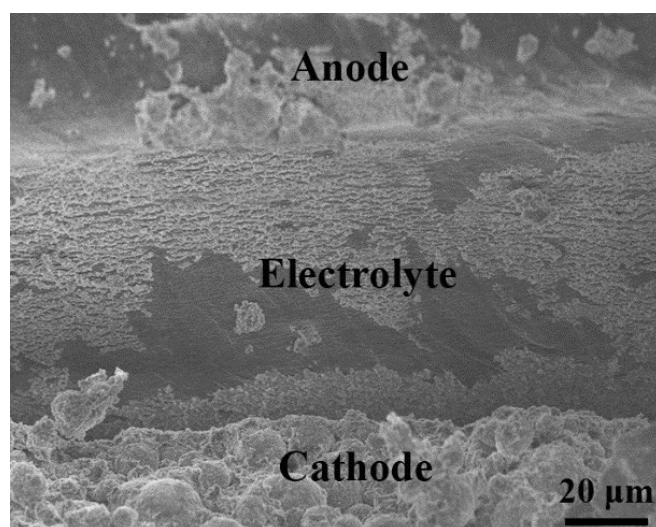

**Fig. S1** Cross-section SEM image of the quasi-solid state Li cell.

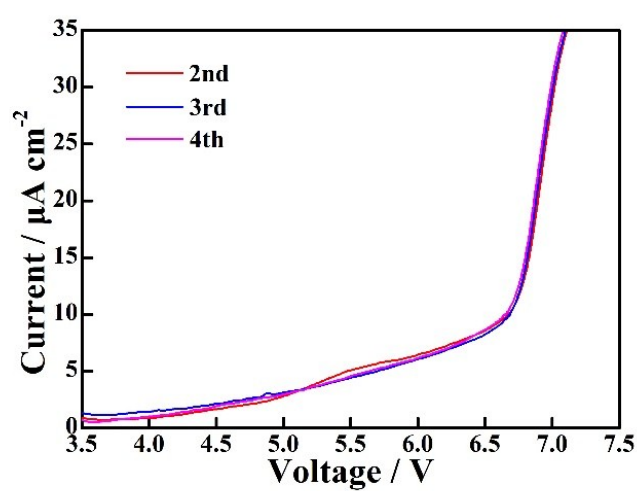

**Fig. S2** LSV curves of QCE-P after the first sweeping.

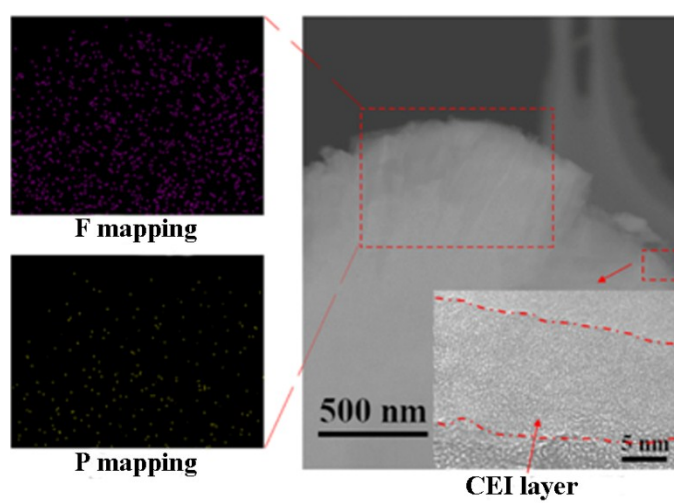

**Fig. S3** HAADF-STEM image and EDS mapping of the particles from the cycled NMC811.

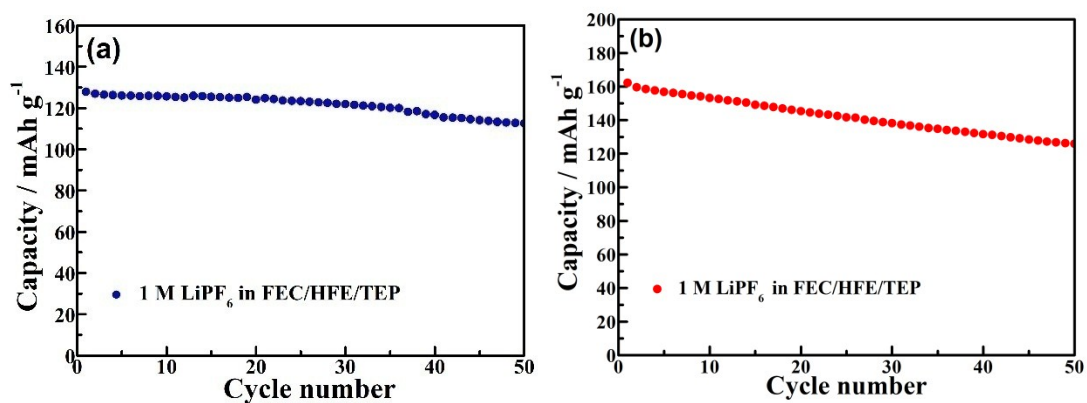

**Fig. S4** Cycling performance of (a) LCO and (b) NMC811 cells in the liquid electrolyte at 1 C and 60°C.

Video 1: Fire test of the QCE-base membrane.

Video 2: Fire test of the QCE-P membrane.

Video 3: Folding test of the NMC811 pouch cell.

Video 4: Cutting test of the NMC811 pouch cell.

Video 5: Nail penetration test of the NMC811 pouch cell.
